# Supplementary material
Source: PubMed Central journal article supplement (PMC5425156)
Supplement: NIHMS855596-supplement-1.pdf [file NIHMS855596-supplement-1.pdf]

# SUPPLEMENTAL MATERIAL

## Def6 restrains osteoclastogenesis and inflammatory bone resorption

Nikolaus Binder, Christine Miller, Masaki Yoshida, Kazuki Inoue, Shinichi Nakano, Xiaoyu Hu, Lionel B. Ivashkiv, Georg Schett, Alessandra Pernis, Steven R. Goldring, F. Patrick Ross, Baohong Zhao

### Supplementary Fig. 1

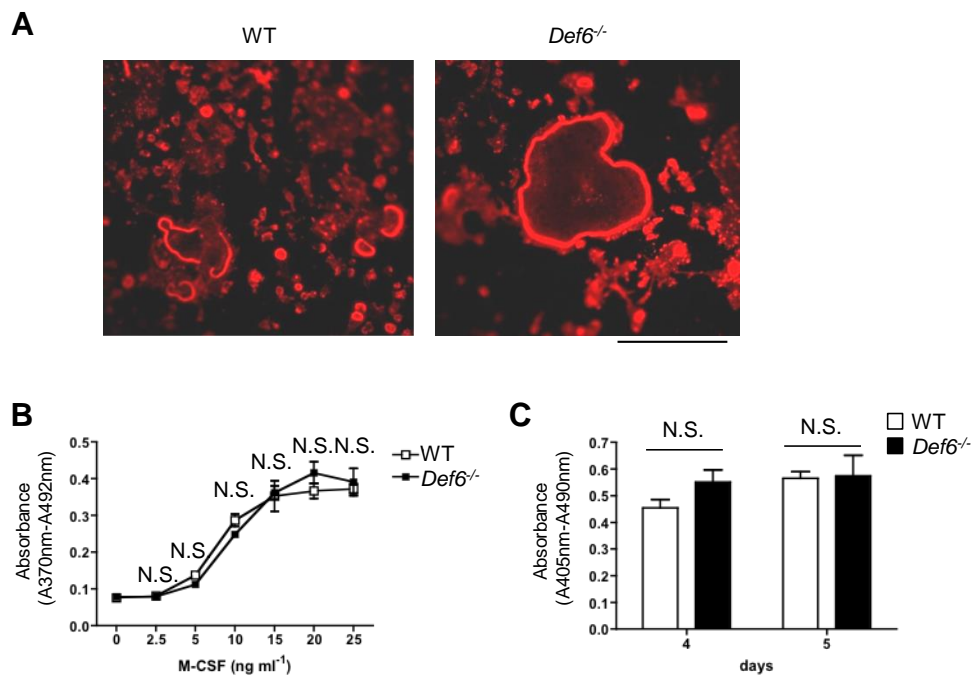

Supplementary Figure 1. (A) Actin ring formation in osteoclasts. The BMMs derived from WT and *Def6*<sup>-/-</sup> mice were treated with RANKL (40 ng/ml) for 4 days and the F-actin was labeled by rhodamine phalloidin. Scale bar: 100µm. (B) The BMMs derived from WT and *Def6*<sup>-/-</sup> mice were treated with M-CSF with the indicated doses for two days and the cell proliferation was analyzed using a BrdU proliferation kit as described in the method. (C) The BMMs derived from WT and *Def6*<sup>-/-</sup> mice were treated with RANKL for 4 or 5 days to induce the formation of mature osteoclasts, which were then starved by culturing in the absence of M-CSF and RANKL for five hours. The cell apoptosis was indicated by the relative amount of the cytoplasmic histone-associated DNA fragments that were measured by the absorbance (A405nm-A490nm) as described in the method. N.S., not statistically significant.

## Supplementary Fig. 2

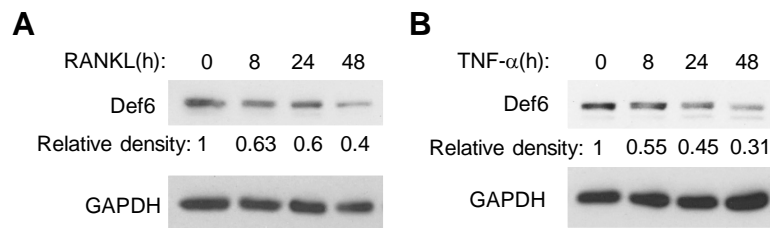

Supplementary Figure 2. Downregulation of Def6 expression in BMMs by TNF- $\alpha$  or RANKL. The WT BMMs was treated with TNF- $\alpha$  (40 ng/ml) or RANKL (40 ng/ml) for the indicated times and immunoblot analysis was performed to detect Def6 expression. GAPDH was used as a loading control. Quantification of the immunoblot bands of Def6 indicated by relative density determined by densitometry was shown below each Def6 band.

# Supplementary Fig. 3

**A**

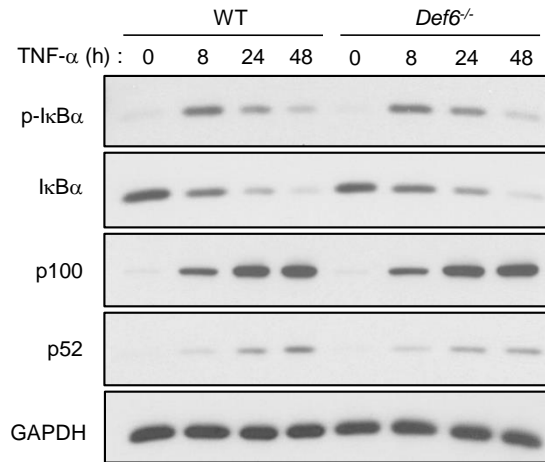

**B**

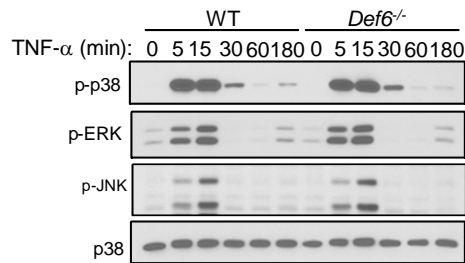

Supplementary Figure 3. *Def6* deficiency does not affect NF-κB or MAPK signaling pathways during osteoclast differentiation induced by TNF-α. (A) Immunoblot analysis of canonical NF-κB signaling components p-IκB and IκB as well as non-canonical NF-κB signaling components P100 and p52. GAPDH was used as a loading control. (B) Immunoblot analysis of p-p38, p-ERK and p-JNK. Total p38 and ERK were used as loading controls. The concentration of TNF was 40 ng/ml.

## Supplementary Fig. 4

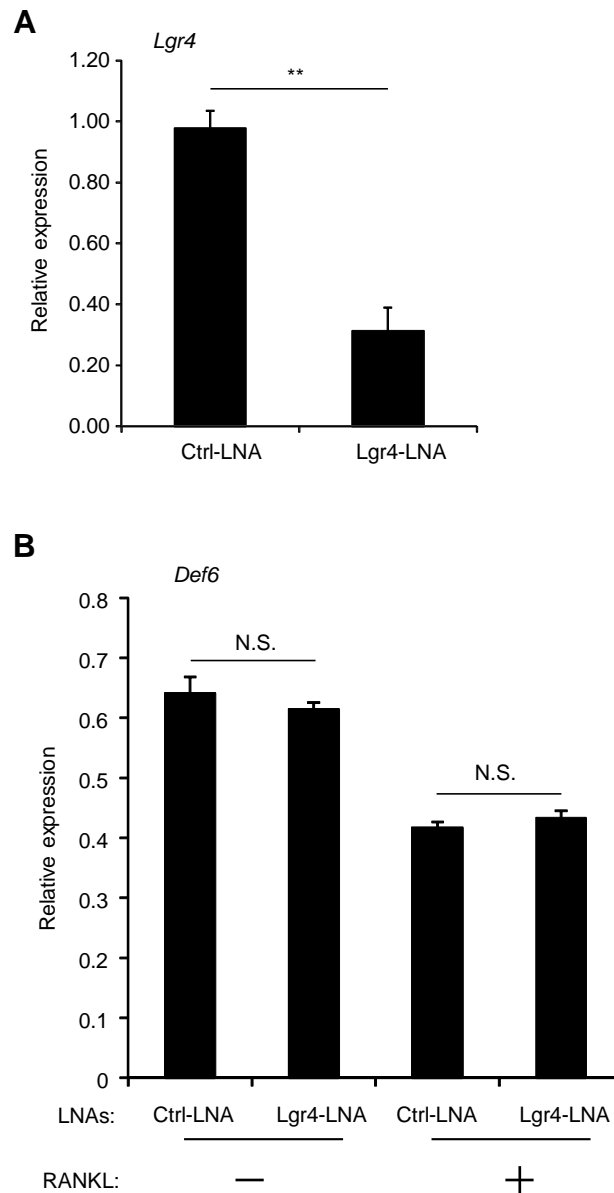

Supplementary Figure 4. Knockdown of *Lgr4* does not affect *Def6* expression. The WT BMMs were transfected with the *Lgr4*-locked nucleic acid (LNA) or non-targeting control LNA for 24 hours to knockdown *Lgr4* expression. The knockdown efficiency of *Lgr4* was analyzed by RT-PCR (A). After the knockdown of *Lgr4*, the cells were treated without or with RANKL (40 ng/ml) for 48 hours and *Def6* expression was analyzed by RT-PCR (B). Data are representative of 3 independent experiments. \* $p < 0.01$ ; N.S., not statistically significant.
